# Supplementary material for: Exploring the Characteristic Aroma of Beef from Japanese Black Cattle (Japanese Wagyu) via Sensory Evaluation and Gas Chromatography-Olfactometry
Source: PubMed Central journal article supplement (PMC7830604; doi:10.3390/metabo11010056), 2021-01-15
Supplement: metabolites-11-00056-s001.pdf [file metabolites-11-00056-s001.pdf]

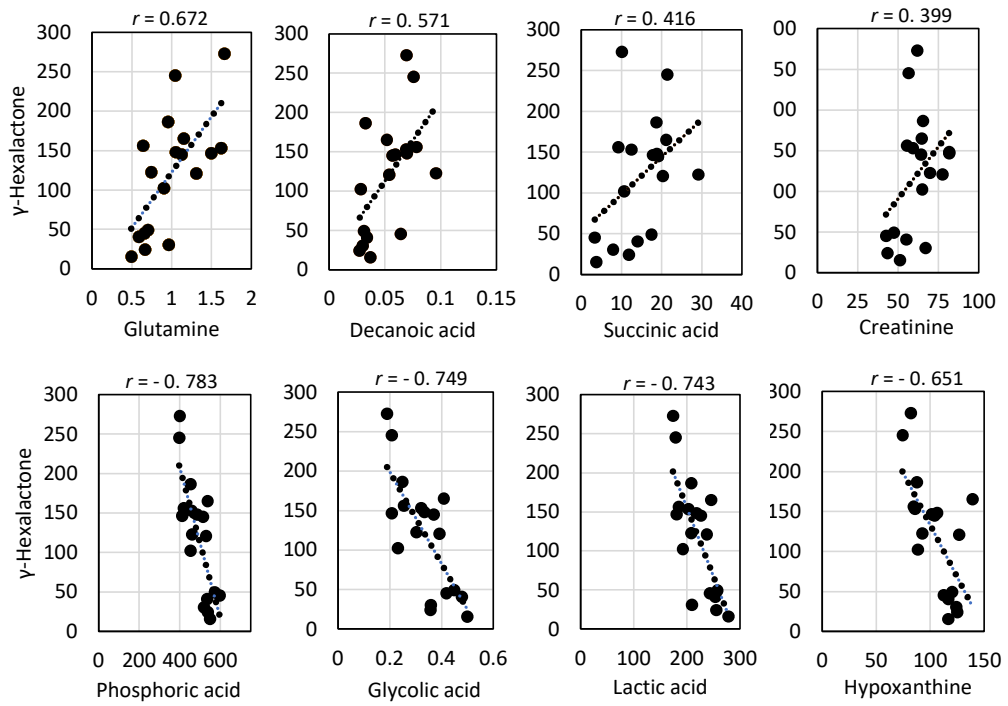

**Figure S1:** Relationship between  $\gamma$ -hexalactone and metabolites in the beef of Japanese Black cattle Type A and Type B and Holstein cattle. The graph shows a scatter plot of metabolites that correlate with  $\gamma$ -hexalactone (each type of cattle,  $n = 6$ ).
